# Supplementary material for: FOXM1 network in association with TREM1 suppression regulates NET formation in diabetic foot ulcers
Source: PubMed Central journal article supplement — EMBO Rep. 2022 Jul 20;23(8):e54558. doi: 10.15252/embr.202154558 (PMC9346470; doi:10.15252/embr.202154558), 2022-07-20
Supplement: EMBR-23-e54558-s001.pdf [file EMBR-23-e54558-s001.pdf]

## Expanded View Figures

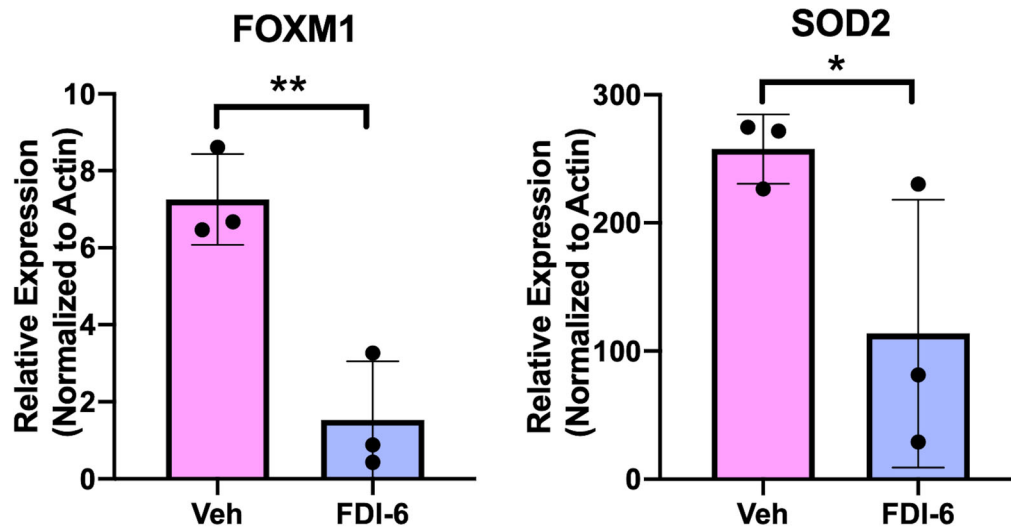

**Figure EV1.** Inhibition of FOXM1 with FDI-6 suppresses FOXM1 expression and downstream target genes in human neutrophils.

Human neutrophils were treated with FDI-6 for 3 h. Vehicle (DMSO) served as a control. Treatment with FDI-6 inhibits FOXM1 expression and its downstream target SOD2.  $n = 3$  biological replicates. Data presented as mean  $\pm$  SD. \* $P < 0.05$ . \*\* $P < 0.01$  (two-tailed unpaired Student's  $t$ -test).

**Figure EV2.** Inhibition of FOXM1 induces NET formation *in vitro* and *in vivo*.

- A Human neutrophils cultured in either normal glucose media (5 mM glucose) or high glucose media (25 mM) to recapitulate diabetic conditions and treated with FDI-6. Vehicle (DMSO) served as a control. NETs were visualized by immunostaining with citH3 and the neutrophil marker, elastase. (Scale bar: 50  $\mu$ m). Quantification of  $n = 4$  biological replicates per group were performed. Data presented as mean  $\pm$  SD. \* $P < 0.05$ , and \*\* $P < 0.01$  (one-way ANOVA followed by Sidak *post-hoc* test).
- B Immunofluorescence staining of vehicle (DMSO) and FDI-6 treated wounds in STZ-induced diabetic mice at day 4 showing basal keratin marker K5, and NET marker citH3. Treatment of diabetic wounds with FDI-6 resulted in increased citH3 compared to vehicle treated wounds. (Scale bar: 50  $\mu$ m). Quantification of wound areas in  $n = 3$  wounds per group were performed with Fiji software. Data presented as mean  $\pm$  SD. \*\* $P < 0.01$  (one-way ANOVA followed by Sidak *post-hoc* test).

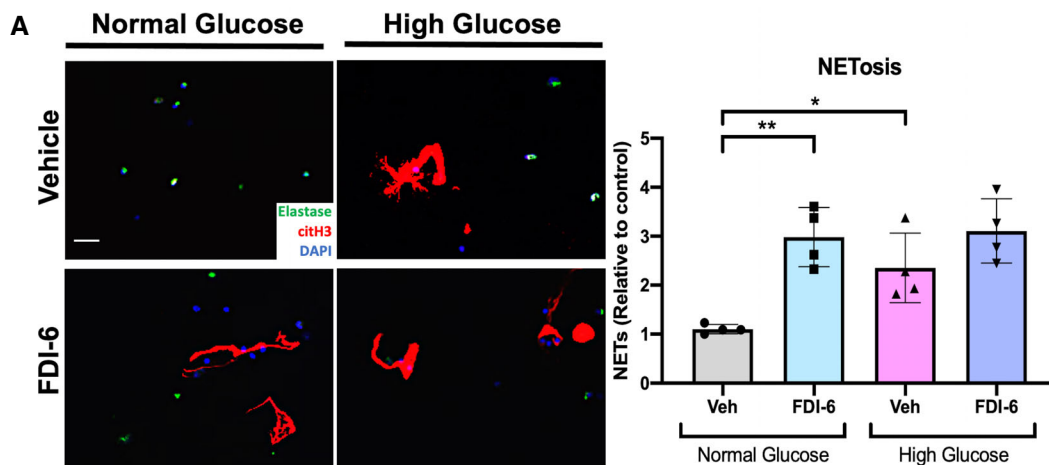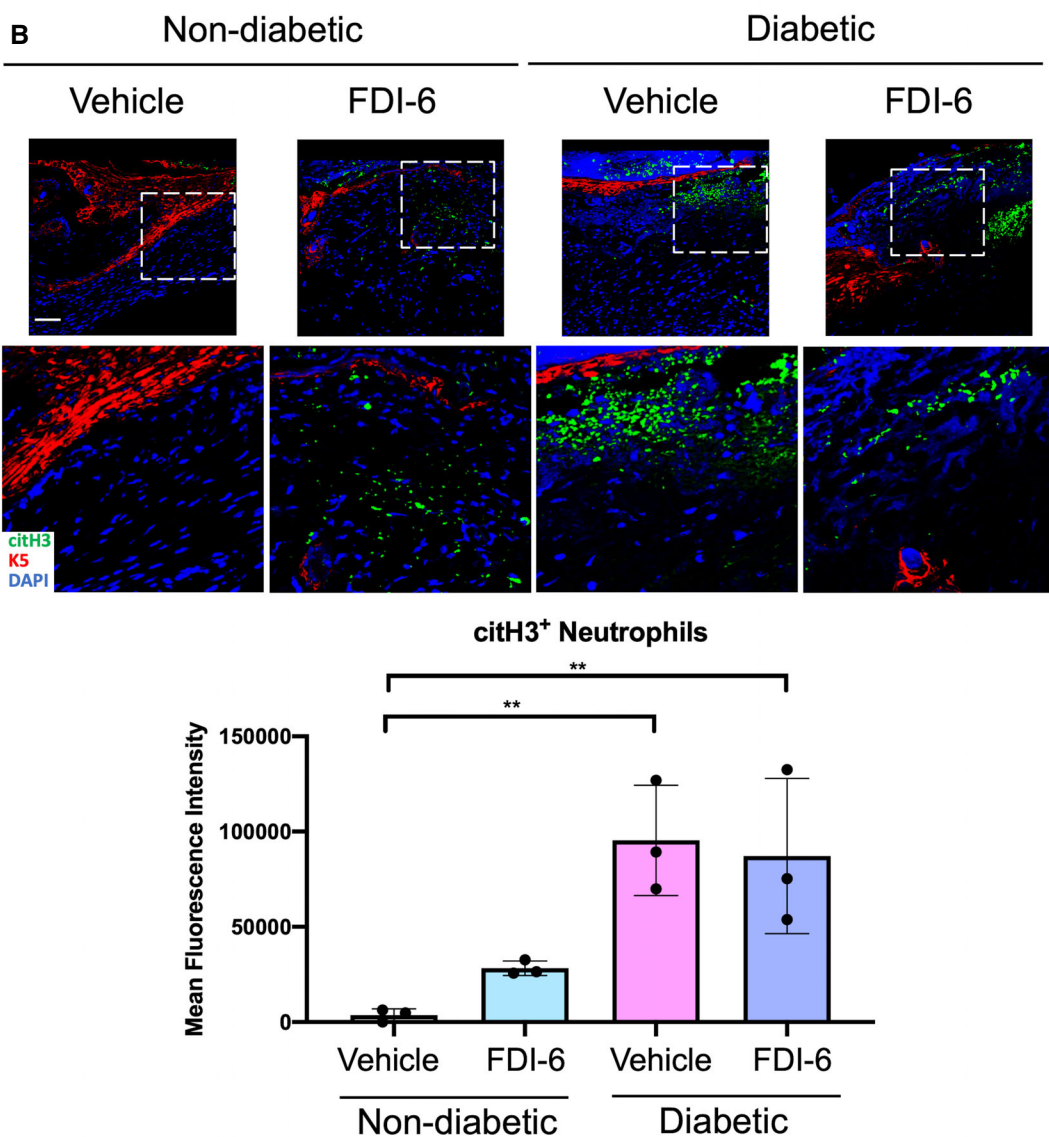

Figure EV2.

**Figure EV3. FOXM1 regulates ROS levels during wound healing.**

- A FOXM1 regulates genes involved in reducing ROS levels and is activated in human skin acute day 3 wounds compared to suppression in human DFUs.
- B Representative images of human neutrophils treated with the FOXM1 inhibitor, FDI-6, in presence or absence of NAC. PMA served as positive control. Reactive oxygen species formation are visualized in green. Representative images of human neutrophils treated with the FOXM1 inhibitor, FDI-6, in presence or absence of NAC. PMA served as positive control. NET formation are visualized in green. (Scale bar: 100  $\mu$ m).

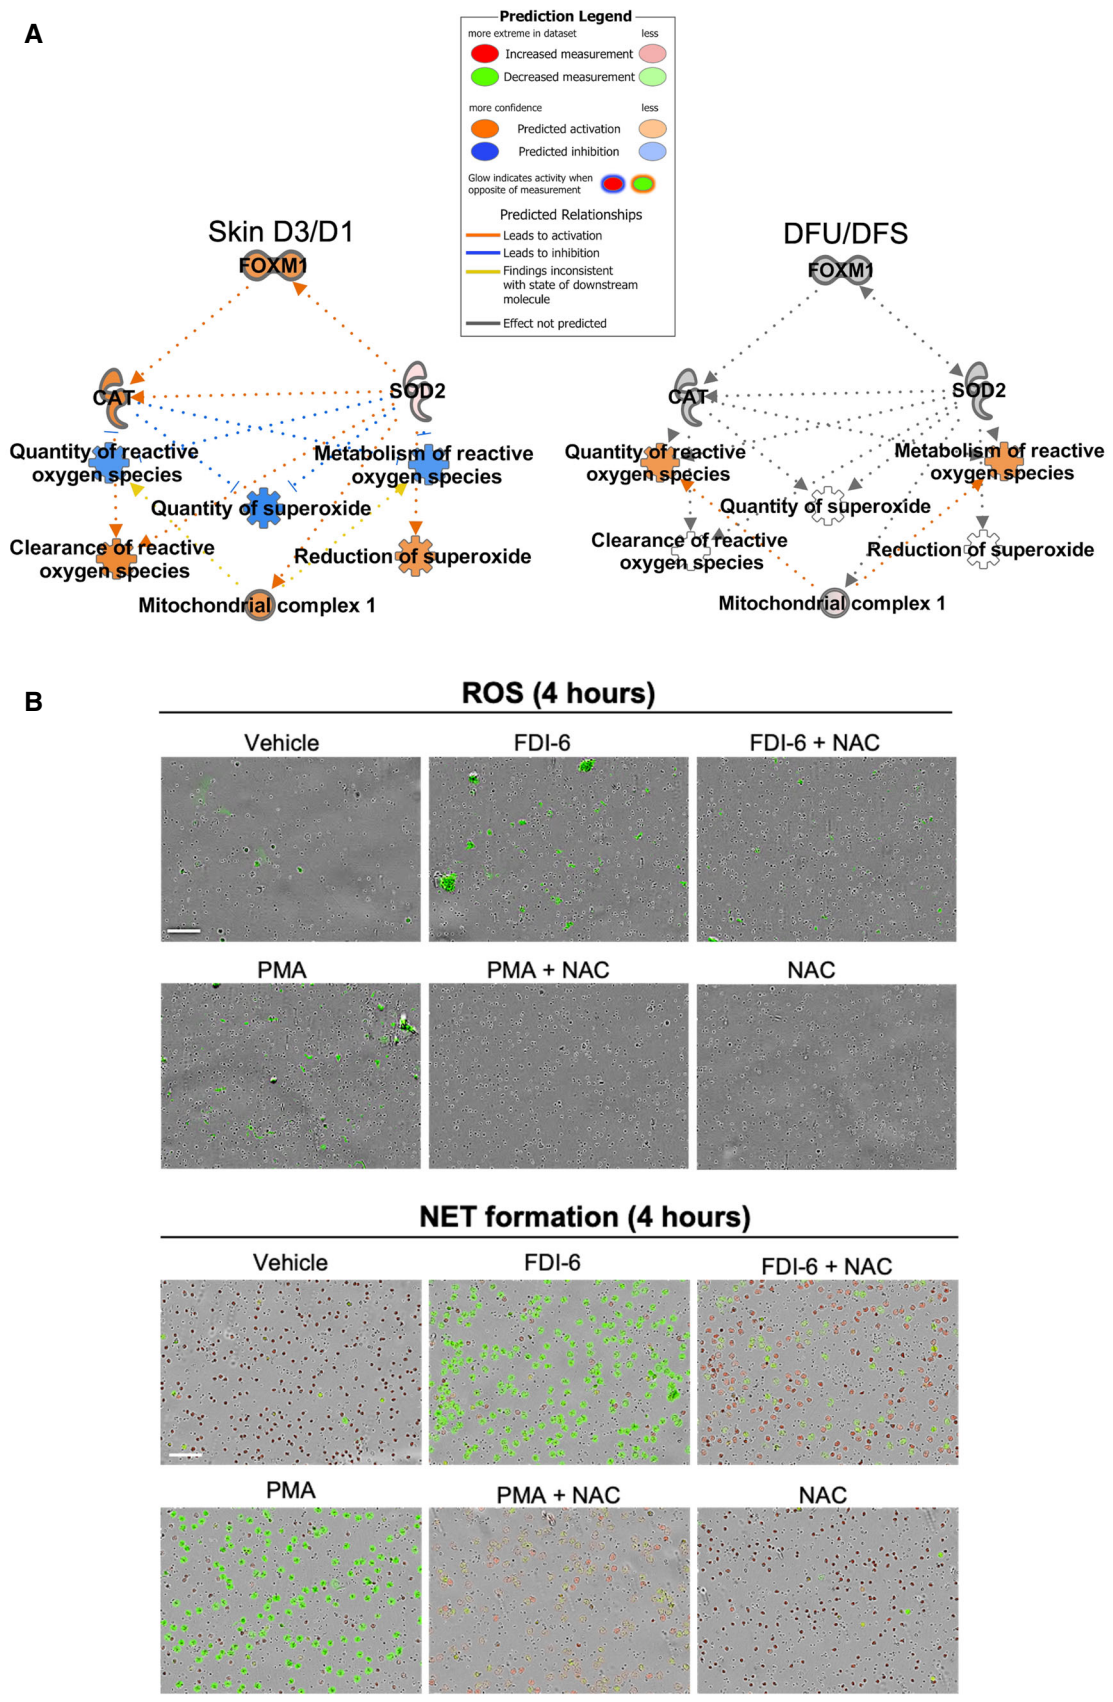

Figure EV3.

**Figure EV4. Treatment with  $\alpha$ -TREM1 has no significant effect on FOXM1 and citH3 in nondiabetic wounds.**

Representative pictures of vehicle (IgG isotype control) and  $\alpha$ -TREM1-treated nondiabetic wounds at day 4 show basal keratin marker K5, and neutrophil marker Ly6G, FOXM1, and citH3. Treatment of wounds with  $\alpha$ -TREM1 resulted in no significant differences in FOXM1<sup>+</sup> and citH3<sup>+</sup> neutrophils compared to vehicle-treated wounds. (Scale bar: 50  $\mu$ m). Quantification of mean fluorescence intensity was performed with Fiji software.  $n = 3$  wounds per group. Data presented as mean  $\pm$  SD (two-tailed unpaired Student's  $t$ -test).

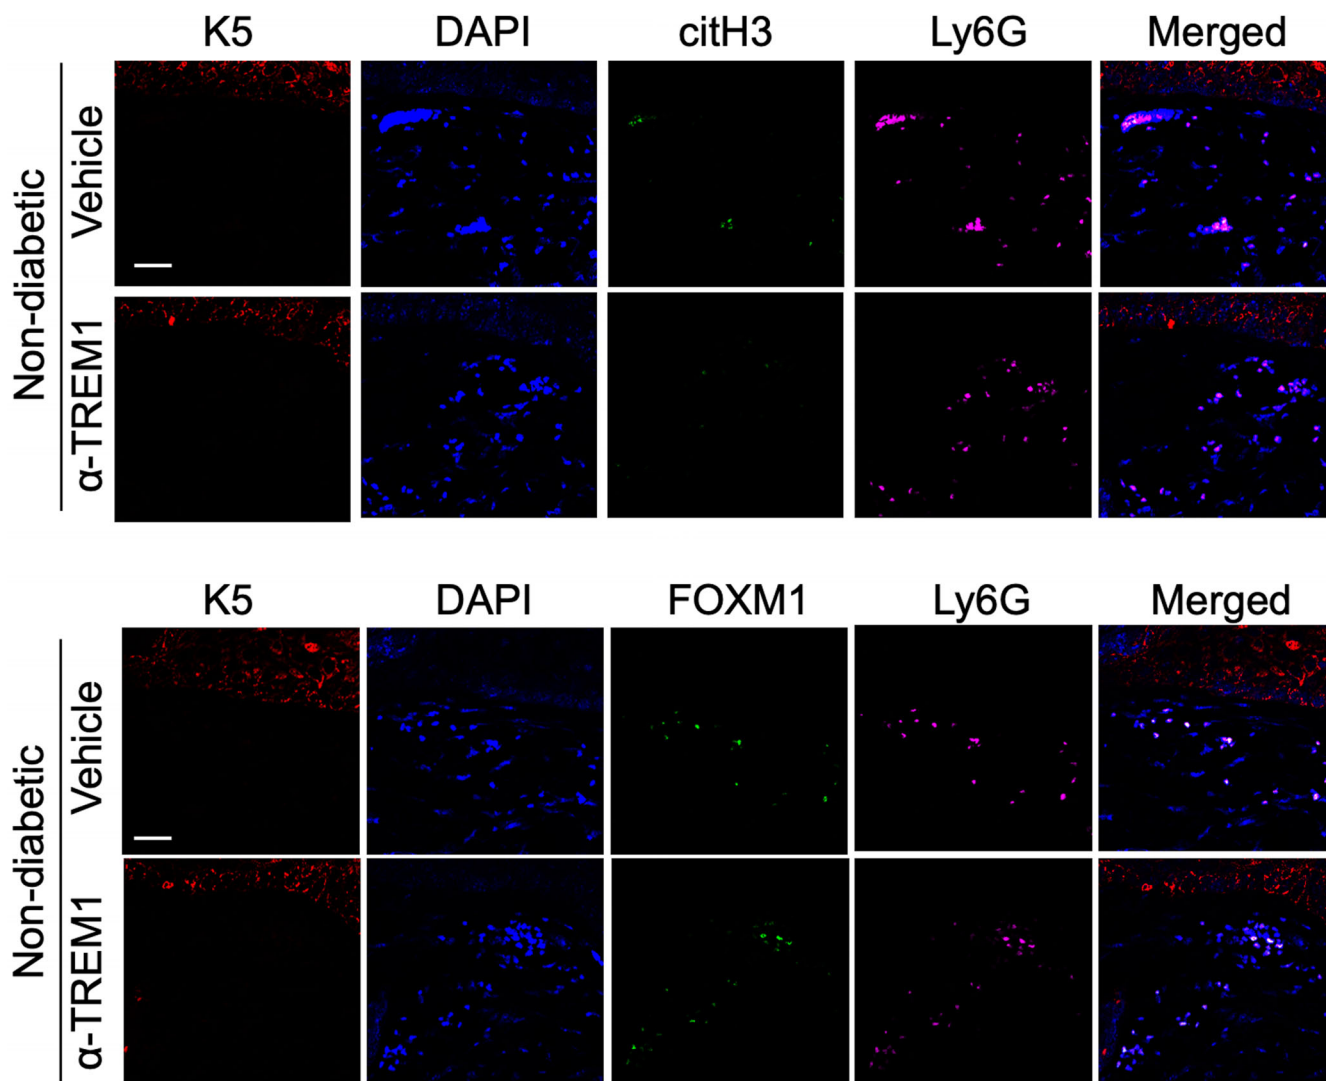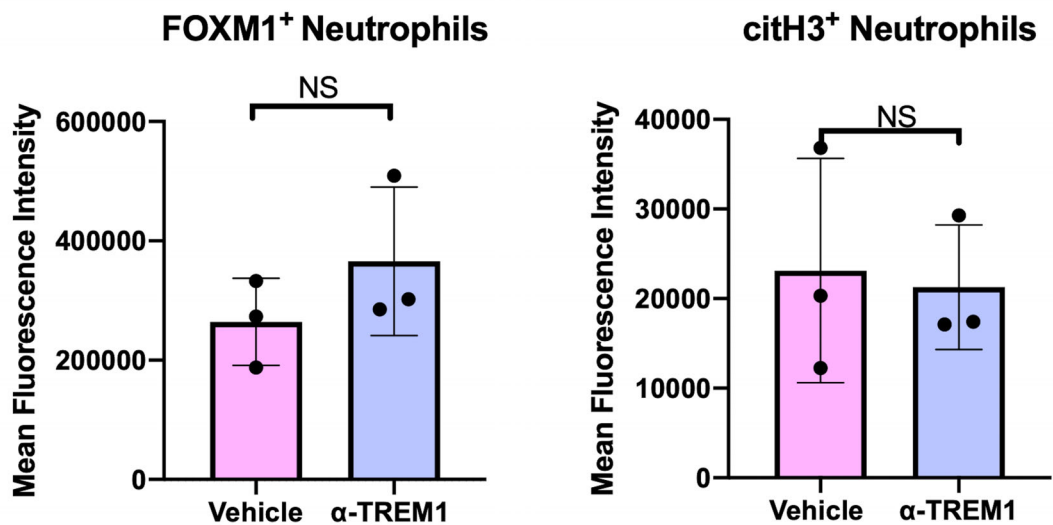

Figure EV4.
